# Supplementary material
Source: PubMed Central journal article supplement (PMC2635033)
Supplement: M806707200_1.pdf [file M806707200_1.pdf]

## Supplemental Figures

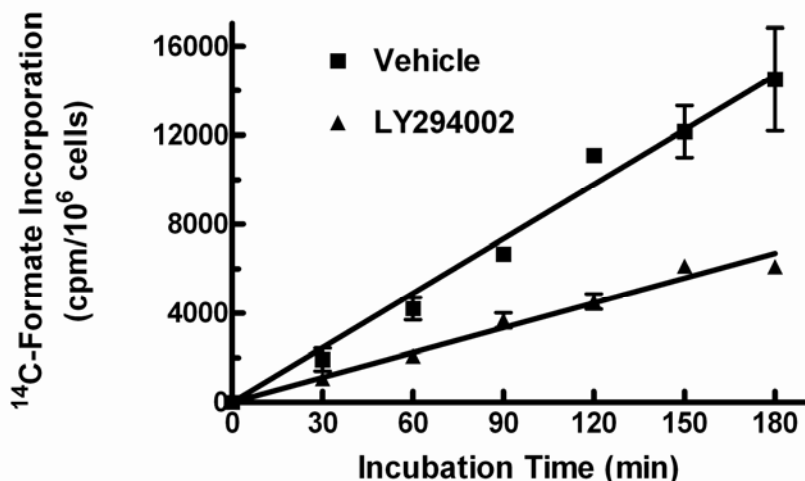

**Fig. S1. Time Course of Formate Incorporation into Purine Nucleotides.**

C2C12 cells were incubated with either 0.2% DMSO (squares, vehicle) or 20  $\mu$ M LY294002 in DMSO (triangles) for 2 h, at which time 10  $\mu$ Ci [<sup>14</sup>C]-formate was added. The cells were then incubated for the indicated times, extracted in 0.4 N perchloric acid, and the extracts processed as described in the text for measuring *de novo* purine synthesis. The data are the mean  $\pm$  SEM of two independent experiments performed in duplicate, with some error bars too small to be seen. Lines were generated by a linear regression analysis of the data using Prism 5 software (Carlsbad, CA); the “ $r^2$ ” value for cells incubated with DMSO was 0.95, and for cells incubated with LY294002 was 0.97.

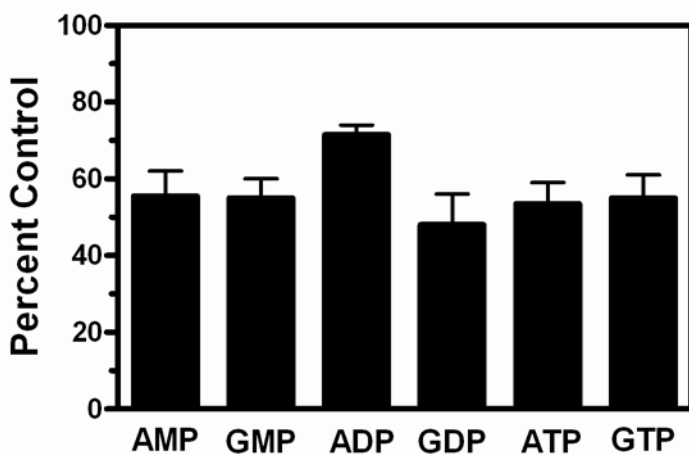

**Fig. S2. Intracellular Concentration of Purine Nucleotides after 15 Hours of Exposure to LY294002.**

C2C12 cells were incubated for 15 h with 0.2% DMSO (vehicle, control) or 20  $\mu$ M LY294002, and were extracted directly into 0.4 N perchloric acid. The extracts were neutralized with  $\text{KHCO}_3$ , and purine nucleotides were separated and quantified by high performance liquid chromatography as described in the text. The data are expressed as percent of the corresponding control value, and are the mean  $\pm$  SEM of two independent experiments performed in duplicate.
