# Supplementary material
Source: PubMed Central journal article supplement (PMC2635033)
Supplement: M806707200_2.pdf [file M806707200_2.pdf]

**Table S1. Intracellular Concentration of Purine Nucleotides after Three Hours of Exposure to LY294002**

C2C12 cells were incubated for 3 h with 0.2% dimethylsulfoxide (vehicle, control) or with 20  $\mu$ M LY294002, and were extracted directly into 0.4 N perchloric acid. The cell extracts were neutralized with  $\text{KHCO}_3$ , and purine nucleotides were separated and quantified by high performance liquid chromatography as described in the text. The data are the mean  $\pm$  SEM of three independent experiments performed in duplicate.

| Condition | AMP                  | GMP             | ADP             | GDP             | ATP            | GTP            |
|-----------|----------------------|-----------------|-----------------|-----------------|----------------|----------------|
|           | (nmol/ $10^6$ cells) |                 |                 |                 |                |                |
| Control   | 0.66 $\pm$ 0.04      | 0.18 $\pm$ 0.02 | 2.63 $\pm$ 0.81 | 0.63 $\pm$ 0.15 | 20.8 $\pm$ 4.7 | 4.63 $\pm$ 2.2 |
| LY294002  | 0.56 $\pm$ 0.04      | 0.17 $\pm$ 0.02 | 3.35 $\pm$ 1.4  | 0.70 $\pm$ 0.25 | 22.0 $\pm$ 8.6 | 5.05 $\pm$ 2.9 |
